# Supplementary material for: MICU1 controls spatial membrane potential gradients and guides Ca2+ fluxes within mitochondrial substructures
Source: PubMed Central journal article supplement (PMC9249747; doi:10.1038/s42003-022-03606-3), 2022-07-01
Supplement: 42003_2022_3606_MOESM3_ESM.pdf [file 42003_2022_3606_MOESM3_ESM.pdf]

# Description of Additional Supplementary Files

**File name:** Supplementary Data

**Description:** Original data for main figures.
